# Supplementary material for: Interventions to Increase Blood Donation among Ethnic/Racial Minorities: A Systematic Review
Source: Hindawi journal article supplement (doi:10.1155/2019/6810959), 2019-04-15
Supplement: f1 [file 6810959.f1.pdf]

S1. Search terms (formatted for Medline via Ovid)

|    |                                                                                                                                                                                                                                                                    |
|----|--------------------------------------------------------------------------------------------------------------------------------------------------------------------------------------------------------------------------------------------------------------------|
| #1 | Blood Donors/ OR 'Blood donation'.tw. OR 'Blood donor'.tw. OR 'Blood bank'.tw.                                                                                                                                                                                     |
| #2 | Minority Groups/ OR Ethnic Groups/ OR Refugees/ OR African Americans/ OR Hispanic Americans/ OR Minority.tw. OR Ethnic.tw. OR Migrant.tw. OR Refugee.tw. OR Indigenous.tw. OR African.tw. OR Asian.tw. OR Hispanic.tw. OR Latino.tw. OR Haitian.tw. OR Chinese.tw. |
| #3 | #1 AND #2                                                                                                                                                                                                                                                          |
| #4 | #3 NOT (Comment/ OR Letter/ OR Editorial/ OR News/)                                                                                                                                                                                                                |

Search string for Google Scholar: Blood donor ethnic minority

S2: Criteria for critical appraisal

| <b>NHMRC level of evidence</b>     |                                                                                                                                                                                                                                                                                |
|------------------------------------|--------------------------------------------------------------------------------------------------------------------------------------------------------------------------------------------------------------------------------------------------------------------------------|
| I                                  | A systematic review of level II studies                                                                                                                                                                                                                                        |
| II                                 | A randomised controlled trial                                                                                                                                                                                                                                                  |
| III-1                              | A pseudorandomised controlled trial (i.e. alternate allocation or other method)                                                                                                                                                                                                |
| III-2                              | A comparative study with concurrent controls: ▪ Non-randomised, experimental trial<br>▪ Cohort study<br>▪ Case-control study<br>▪ Interrupted time series with a control group                                                                                                 |
| III-3                              | A comparative study without concurrent controls:<br>▪ Historical control study<br>▪ Two or more single arm study<br>▪ Interrupted time series without a parallel control group                                                                                                 |
| IV                                 | Case series with either post-test or pre-test/post-test outcomes                                                                                                                                                                                                               |
| <b>NHMRC Magnitude of effect</b>   |                                                                                                                                                                                                                                                                                |
| Low                                | Difference is statistically significant AND the confidence interval does not include any clinically important effects<br>OR<br>Difference is not statistically significant AND the range of estimates defined by the confidence interval includes clinically important effects |
| Medium                             | Difference is statistically significant AND the point estimate of effect is clinically important but the confidence interval includes some clinically unimportant effects                                                                                                      |
| High                               | Difference is statistically significant AND there is a clinically important benefit for the full range of estimates defined by the confidence interval                                                                                                                         |
| <b>CASP risk of bias appraisal</b> |                                                                                                                                                                                                                                                                                |
| 1                                  | Did the study address a clearly focussed issue?                                                                                                                                                                                                                                |
| 2                                  | Were the participants recruited in an acceptable way?                                                                                                                                                                                                                          |
| 3                                  | Was the exposure accurately measured to minimise bias?                                                                                                                                                                                                                         |
| 4                                  | Was the outcome accurately measured to minimise bias?                                                                                                                                                                                                                          |
| 5                                  | Have the authors identified all important confounding factors?                                                                                                                                                                                                                 |
| 6                                  | Have they taken account of the confounding factors in the design and/or analysis?                                                                                                                                                                                              |
| 7                                  | Was the follow up of participants complete enough?                                                                                                                                                                                                                             |
| 8                                  | Was the follow up of participants long enough?                                                                                                                                                                                                                                 |
| 9                                  | Any other bias concerns                                                                                                                                                                                                                                                        |

S3: Reasons for exclusion of full text articles

| <b>Reason for exclusion</b>                              | <b># of articles</b> |
|----------------------------------------------------------|----------------------|
| Did not evaluate an intervention                         | 95                   |
| Was not conducted in a High Income country               | 41                   |
| Did not relate to blood donation                         | 13                   |
| Only available as a conference abstract                  | 10                   |
| Reported on blood donation for research, not transfusion | 8                    |
| Did not report outcomes                                  | 3                    |
| Did not include ethnic/racial minority participants      | 4                    |
| Had no English full-text version available               | 2                    |
| Did not include adults as participants                   | 1                    |
